1                   **CONCENTRATION OF THIOUREA IS EFFECTIVE IN BREAKING THE**  
2                                           **DORMANCY OF POTATO VARIETIES.**

3  
4  
5 Sambat Ranabhat<sup>1\*</sup>, Madhav Dhital<sup>2¶</sup>, Ramkrishna Subedi<sup>3¶</sup>, Ansu Adhikari<sup>1</sup>, Binod Adhikari<sup>1&</sup>,  
6 Saroj Shrestha<sup>1&</sup>

7  
8 <sup>1</sup>Agriculture and Forestry University, Rampur, Nepal

9 <sup>2</sup>Department of Horticulture, Agriculture and Forestry University, Rampur, Nepal

10 <sup>3</sup>Plant Quarantine and Pesticide Management Center, Hariharbhawan, Kathmandu, Nepal

11  
12  
13  
14 \*Corresponding Author

15 [ranabhatsambat@gmail.com](mailto:ranabhatsambat@gmail.com) (SR)

16  
17  
18 ¶These authors contributed equally to this work

19 &These authors also contributed equally to this work

20  
21  
22  
23  
24

25 **Abstract**

26           Potato germination is highly sensitive to ecological conditions. High altitude and low  
27 annual average temperature results in tuber dormancy and poor sprouting. Dormancy has become  
28 a significant constraint for lowering potato production that hinders the possibility of growing two  
29 crops per year. An experiment was conducted from February to April 2020, where two major  
30 potato varieties (Desiree and Cardinal) were treated with four concentrations of Thiourea (0, 1, 2,  
31 and 3%) in a two factorial completely randomized block design with three replications. Results  
32 showed that Thiourea has a significant effect on all observed attributes as per varieties of potato.  
33 For Desiree variety, Thiourea (1%) decreased breaking of dormancy by 22 days compared to  
34 control (Desiree\*Thiourea 0%) and produced the longest average sprout of 7.36cm at 49 days  
35 after treatment (DAT). On the other hand, for the Cardinal variety, Thiourea (3%) decreased  
36 tuber dormancy by 27 days compared to control (Cardinal\*Thiourea 0%) and produced a sprout  
37 of 7.75 cm at 49 DAT. In conclusion, for breaking dormancy and enhancing sprouting of potato  
38 varieties Desiree and Cardinal, Thiourea concentration of 1% and 3% is recommended,  
39 respectively.

40 **Keywords:** Potato tubers (*Solanum tuberosum L.*), Dormancy breaking, Thiourea, Potato sprout

41

42

43

44

45

46

47

48

## 49 **Author summary**

50 This work is the combined effort of all the authors; conceptualization and designing the  
51 plot experiments, S.R. and M.D.; performing the experiment and data collection, S.R. and A.A.;  
52 statistical analysis and preparation of presentation table and figure, S.R. and B.A.; writing the  
53 original draft and editing the whole manuscript, S.R., M.D., R.S., S.S., and A.A. All the author  
54 have read and agreed to the published version of the manuscript.

55

## 56 **Introduction**

57 Potato (*Solanum tuberosum L*) is one of the vital food crops that is mostly grown in  
58 Nepal's mid-hill region. In most developing countries such as Nepal, Potato is an important cash  
59 crop to resolve food insecurity and reduce poverty among smallholder farmers [1].

60 Several ecological conditions such as temperature, humidity, light, and soil play a key role  
61 during several developmental phases of potato such as germination, sprouting, vegetative  
62 growth, and maturity. In potato, the tuber germination and establishment stage is highly sensitive  
63 to severe cold leading to the tuber's dormancy.

64 Dormancy is defined as the rest period under which sprouts fails to develop from any bud  
65 of tuber even though tuber is kept in ideal condition [2]. The tuber's dormancy period is  
66 governed by several factors, i.e., potato cultivar, growing condition, storage duration, and tuber  
67 size [3,4,5,6]. The tuber's dormancy results in low sprouting and poor establishment of the crop  
68 even in favourable growing conditions, which is one of the major causes of the decline in potato  
69 production. Also, more extended dormancy of tuber affects the possibility of cultivating potato  
70 more than once per year in various regions.

71 It is essential to break the dormancy of the potato tuber. Tuber treatment with a chemical  
72 such as Gibberellic acid, Thiourea, Ethylene Chlorohydrin, carbon disulfide, and Bromoethane  
73 can remove the tuber's dormancy [7,8,9]. In recent years, Thiourea is used for breaking of  
74 dormancy of the potato tuber. Still, it is difficult to find research work that compares the  
75 effectiveness of various concentrations of Thiourea along with the potato varieties.

76 To address this knowledge gap, this research will help compare several levels of Thiourea  
77 concentration and determine effective one for breaking dormancy of potato tuber along with  
78 different varieties. Thiourea is defined as a catalyze inhibitor, which plays a crucial role in

79 stimulating potato tuber germination. Application of Thiourea at appropriate concentration  
80 supports the germination process and develop multiple sprouts per eye of potato tuber [10,11].  
81 Potato tuber producing a primary sprout length of at least 2mm is a reliable confirmation for  
82 breaking the dormancy period [12]. It was reported that potato tuber treated with Thiourea and  
83 hydrogen peroxide was found to have the early breaking of dormancy, i.e., 6 days and 10 days,  
84 respectively [13]. In Thiourea's case, soaking the potato tuber in 1%, aqueous solution for one  
85 hour is suggested to break the tubers' dormancy [7,10]. However, another report has shown that  
86 the treatment of freshly harvested mini tuber with 20 g/l Thiourea for 3 hours was effective than  
87 30 g/l for dormancy reduction [14].

88

## 89 **Model**

90 The research was carried out from 16<sup>th</sup> February to 16<sup>th</sup> April 2020. The experiment was  
91 based on two factorial CRD design with three replications. Two popular varieties of potato in  
92 Nepal (Desiree and Cardinal) were considered as 1<sup>st</sup> factor. On the other hand, four Thiourea  
93 concentrations (0, 1, 2, & 3%) were taken as 2<sup>nd</sup> factor.

94

## 95 **Methods**

### 96 **Tuber collection**

97 Freshly harvested potato tubers of two varieties were collected. Altogether 300 potato  
98 tubers of uniform shape and size were collected, i.e., 150 tubers of each type. The average  
99 weight of the tuber was 30-40 gm.

### 100 **Preparation of Thiourea solution**

101 The Thiourea solution of different concentrations (1, 2, and 3%) was prepared by  
102 dissolving a calculated amount of Thiourea (Granules) in distilled water in separate plastic  
103 buckets. For a 1% solution, 30gm of Thiourea was dissolved in 3 litres of distilled water.  
104 Similarly, 60gm and 90gm Thiourea were dissolved in 3 liters distilled water for 2% and 3%  
105 solution.

106 **Details of treatment**

107 The potato tubers of different varieties were treated with varying concentrations of  
108 Thiourea. Each treatment had ten potato tubers of uniform shape and size. The tubers were  
109 soaked in the solution for 2 hours. While for control, the tuber was soaked in distilled water for  
110 the same period. After that, the soaked tuber was air-dried until all the excess solution in the  
111 tuber surface was removed. Then, the tubers were placed in a plastic tray and kept in the  
112 darkroom.

113 **Bio-Metric observation**

114

115 **Days to the First emergence:** The total days required to induce the emergence of the first sprout  
116 was taken as days to the first emergence. For this, potato tubers from each treatment combination  
117 were observed each morning to ensure the emergence of any sprouts. Only the sprout that  
118 reached a length of 2mm was counted as the first sprout from that particular tuber.

119 **Breaking of Dormancy:** Breaking of dormancy is considered by the number of days elapsing  
120 from the treatment until 80% of the tuber has at least one sprout equal to or longer than 2mm  
121 [12]. Here, a tuber from each treatment combination was inspected individually for producing  
122 the sprout of at least 2mm; once 80% of the tuber under observation had a sprout of at-least  
123 2mm, then breaking of dormancy was calculated.

124 **Sprouting length:** The sprout's length was measured using a scale equipped with millimeter  
125 reading for earlier data recording days. As the sprout length increased, a scale provided with  
126 centimeter reading was used. The average sprout length was measured regularly at an interval of  
127 7 days up to 49 days of the experiment, starting from the first sprout initiation on the tuber.

128 **Sprouting density:** The total number of sprout per tuber was counted, and the average sprouting  
129 density was calculated. The tuber of each treatment combination was observed closely at an  
130 interval of 7 days. Those sprouts longer than 2mm from a particular tuber was counted, and  
131 sprouting density was determined.

132 **Data analysis technique**

133 The data were collected at an interval of 7 days, and a total of 49 days of data was observed.  
134 The statistical analysis of data was done by using statistical packages, namely Microsoft Excel  
135 and R-studio. Duncan's Multiple Range Test (DMRT) was used for mean separation and  
136 comparison at 5% significance level.

137

## 138 Results and Discussion

139

### 140 Early sprouting and breaking dormancy

141 Throughout the experiment, we can observe the significant effect of Thiourea's different  
 142 concentrations on dormancy breaking of tubers. The dormancy period was shorter in the tubers  
 143 of both varieties treated with Thiourea compared to control. A Similar result was established by  
 144 [10,13,15].

145 In tubers of Desiree variety treated with Thiourea (1%), sprouting started 6.33 days after  
 146 treatment, whereas sprouting was started at 28 days for control. Moreover, the breaking of  
 147 dormancy was achieved at 10.33 days after onset of treatment, which took 32.67 days for control  
 148 tubers Table 1. On the other hand, tubers of Cardinal variety treated with Thiourea (3%) started  
 149 sprouting at the 6.67<sup>th</sup> day after the treatment while sprouting on control was initiated at 33.67<sup>th</sup>-  
 150 day from the onset of treatment. In addition, breaking dormancy was found at 13.33<sup>th</sup> day after  
 151 the beginning of treatment, which was achieved after 40.67<sup>th</sup> day for control Table 1.  
 152 Furthermore, it was observed that Thiourea at any concentration shortens the dormancy period of  
 153 tuber as compared to control

154 Table 1: Days to emergence and breaking of dormancy as influenced by the interaction of variety  
 155 and different concentration of Thiourea at Dailekh, Nepal (2020)

| Treatments                       | Days to emergence(DTE) | Days to Breaking of Dormancy |
|----------------------------------|------------------------|------------------------------|
| <b>Interaction of Two factor</b> |                        |                              |
| Desiree*Thiourea 1%              | 6.33 <sup>e</sup>      | 10.33 <sup>f</sup>           |
| Desiree*Thiourea 2%              | 9.33 <sup>d</sup>      | 13.33 <sup>e</sup>           |
| Desiree*Thiourea 3%              | 10.33 <sup>d</sup>     | 15.00 <sup>d</sup>           |
| Desiree* Control                 | 27.67 <sup>b</sup>     | 32.67 <sup>b</sup>           |
| Cardinal*Thiourea 1%             | 13.0 <sup>c</sup>      | 18.66 <sup>c</sup>           |
| Cardinal*Thiourea 2%             | 12.67 <sup>c</sup>     | 17.67 <sup>c</sup>           |
| Cardinal*Thiourea 3%             | 6.67 <sup>e</sup>      | 13.33 <sup>e</sup>           |
| Cardinal*Control                 | 33.67 <sup>a</sup>     | 40.67 <sup>a</sup>           |
| LSD (=0.05)                      | 1.271***               | 1.416***                     |
| SEm (±)                          | 0.424                  | 0.472                        |
| CV %                             | 4.912                  | 4.05                         |
| Grand mean                       | 14.95                  | 20.20                        |

156 SEM- standard error of the mean, CV- Coefficient of variation, LSD- Least significant difference, \*\*- significant at  
 157 1% level of significance, \*\*\*-significant at 0.1% level of significance, common letter(s) within the column indicate  
 158 non-significant difference based on Duncan Multiple Range Test (DMRT)at 0.05 level of significance

159 In conclusion, for Desiree tubers, Thiourea (1%) shortens the dormancy period by 22  
160 days compared to control. On the other hand, for Cardinal tubers, Thiourea (3%) shortens the  
161 dormancy period by 28 days compared to control Tables 1 and 2.

162

### 163 **Sprouting length**

164 Treatment of the potato tubers with different Thiourea concentrations had a positive and  
165 significant increment in the average sprout length in both varieties. A similar result was  
166 conformed to those established by [14,15] on the increase in sprout length and thickness on tuber  
167 treatment with Thiourea.

168 For Desiree variety, using Thiourea with 1% concentration produced the longest sprout of  
169 7.36 cm length at 49 DAT which was significantly higher than other concentrations 0, 2, and 3%,  
170 which had sprout of 2.55, 6.02, and 5.72cm, respectively, at 49 DAT Fig 1. On the other hand,  
171 for Cardinal variety, Thiourea (1%) developed the longest sprout of 8.22 cm, which was  
172 statistically similar to 3% Thiourea, i.e., 7.75 cm at 49 DAT. Thiourea at a concentration of 2%  
173 and control produced shorter sprout of 6.58 cm and 1.92 cm at 49 DAT, respectively Fig 2.

174 In conclusion, Thiourea (1% and 3%) was indistinctly superior to other Thiourea concentrations  
175 in Cardinal for developing the longest sprouts. While in the case of Desiree, Thiourea (1%)  
176 produced the longest sprout than the remaining concentrations, Fig 1 and 2.

177

### 178 **Sprouting density**

179 Treatment of tubers with Thiourea of different concentrations showed a significant  
180 increment in sprout number per tuber for both varieties compared to control. The obtained result  
181 was similar to [11,14], who reported Thiourea treated tuber developed more sprout numbers than  
182 control.

183 Tubers of Desiree variety treated with Thiourea (1%) produced the greatest number of  
184 sprout, i.e., 4.13 sprouts/tuber, whereas control tubers made the least number of sprouts, i.e., 1.80  
185 sprouts/tuber. Among all concentrations of Thiourea (1%) had significantly higher sprouting  
186 density for Desiree Fig 3. Whereas for tubers of Cardinal variety, Thiourea (3%) was found to  
187 produce significantly higher sprouting density, i.e., 1.91 sprouts/tuber compared to other  
188 concentration and lowest sprouts per tuber was developed by control, i.e., 1.13 sprouts/tuber  
189 Fig 4.

190 In conclusion, Desiree and Cardinal Variety of potato, when treated with Thiourea of  
191 concentration 1% and 3% respectively, increased the sprouting number per tuber compared to  
192 control and other concentration Fig 3 and 4.

## 193 **Conclusion**

194 In conclusion, among all treatment combination for Desiree variety, Thiourea (1%) was  
195 seen superior in a various parameter such as the emergence of first sprout (6.33<sup>th</sup> day), breaking  
196 of dormancy (10.33<sup>th</sup> day), sprout length (7.36cm) at 49 DAT and sprout density (4.13  
197 sprouts/tuber) at 49 DAT. On the other hand, for cardinal variety, Thiourea (1%) was seen  
198 superior for a parameter such as a sprout length (8.22cm) at 49 DAT. However, the emergence of  
199 first sprout (6.67<sup>th</sup> day), breaking of dormancy (13.33<sup>th</sup> day), and sprout density (1.91  
200 sprouts/tuber) at 49 DAT was found superior at Thiourea (3%).

201 Based on this study, it is recommended that a lower concentration of Thiourea, i.e., 1%  
202 was effective for dormancy breaking of potato tubers and enhancing sprouting behavior for  
203 Desiree variety. While for Cardinal variety, 3% Thiourea was found effective for dormancy  
204 breaking and improving sprouting behavior.

205

206

## 207 **Acknowledgement**

208 I take great pleasure to express my sincere and intense sense of gratitude to Agriculture and  
209 Forestry University and the Prime Minister's Agriculture Modernization Project (PMAMP).

210

211

212

213

214

215

216

217

218

219

220

221

222



## 223 Reference

- 224 1. Timsina KP, Kafle K, Sapkota S. Economics of potato (*Solanum tuberosum* L) production in  
225 Taplejung district of Nepal. *Agronomy Journal of Nepal*. 2011;2:173-81.  
226
- 227 2. Reust W, Winiger FA, Hebeisen T, Dutoit JP. Assessment of the physiological vigour of new  
228 potato cultivars in Switzerland. *Potato Research*. 2001 1st March;44(1):11-7.  
229
- 230
- 231 3. Emilsson B. *Studies on the rest period and dormant period in the potato tuber* (Doctoral  
232 dissertation, Kungl. Lantbruksakademien).  
233
- 234 4. Lommen WJ. Effect of weight of potato minitubers on sprout growth, emergence and plant  
235 characteristics at emergence. *Potato Research*. 1994 Sep 1;37(3):315-22.  
236
- 237 5. WIERSEMAN S, Cabello R, Booth RH. Storage behaviour and subsequent field performance of  
238 small seed potatoes. *Tropical science*. 1987;27(2):105-12.  
239
- 240 6. El Nashar AT, Abdalla MM, Kandeel MN, Abd El Aal SA. Effect of seed tuber size of some  
241 potato cultivars on productivity of autumn plantation. *Assiut journal of agricultural sciences*.  
242 1995.  
243
- 244 7. Bryan JE. Breaking dormancy of potato tubers. CIP; 1989.  
245
- 246 8. Otroshy M. Utilization of tissue culture techniques in a seed potato tuber production scheme.  
247 2006.  
248
- 249 9. Rezaei A, Soltani A. Potato production. Mashhad University Publication, Iran. 1996.  
250
- 251 10. Germchi S, Behroozi FG, Badri S. Effect of Thiourea on dormancy breaking and yield of potato  
252 (*Solanum tuberosum* L.) minitubers Marfona cv. in greenhouse. In *International Conference on*  
253 *Environmental and Agriculture Engineering 2011* (Vol. 15, pp. 19-24).  
254
- 255 11. Rehman F, Lee SK, Joung H. Effect of Various Chemicals on Carbohydrate Content in Potato  
256 Microtubers after Dormancy Breaking. *Asian Journal of Plant Sciences*. 2002.  
257
- 258 12. Van Ittersum MK, Struik PC. Relation between stolon and tuber characteristics and the duration  
259 of tuber dormancy in potato. *NJAS wageningen journal of life sciences*. 1992 1st June;40(2):159-  
260 72.  
261
- 262 13. Bajji M, M'Hamdi M, Gastiny F, Rojas-Beltran JA, Du Jardin P. Catalase inhibition accelerates  
263 dormancy release and sprouting in potato (*Solanum tuberosum* L.) tubers. *Biotechnologie,*  
264 *agronomie, société et environnement*. 2007;11(2):121-31.  
265

- 266 14. Hosseini MB, Afshari RT, Salimi K. Breaking dormancy of potato minitubers with Thiourea.  
267 Potato Journal. 2011;38(1):9-12.  
268
- 269 15. Mani F, Bettaieb T, Doudech N, Hannachi C. Effect of hydrogen peroxide and Thiourea on  
270 dormancy breaking of microtubers and field-grown tubers of potato. African Crop Science  
271 Journal. 2013 26th July;21(3):221-34.

**Fig 1: Effect of different Thiourea concentration on sprout length (cm) of Desiree potato at 49 days after treatment.**

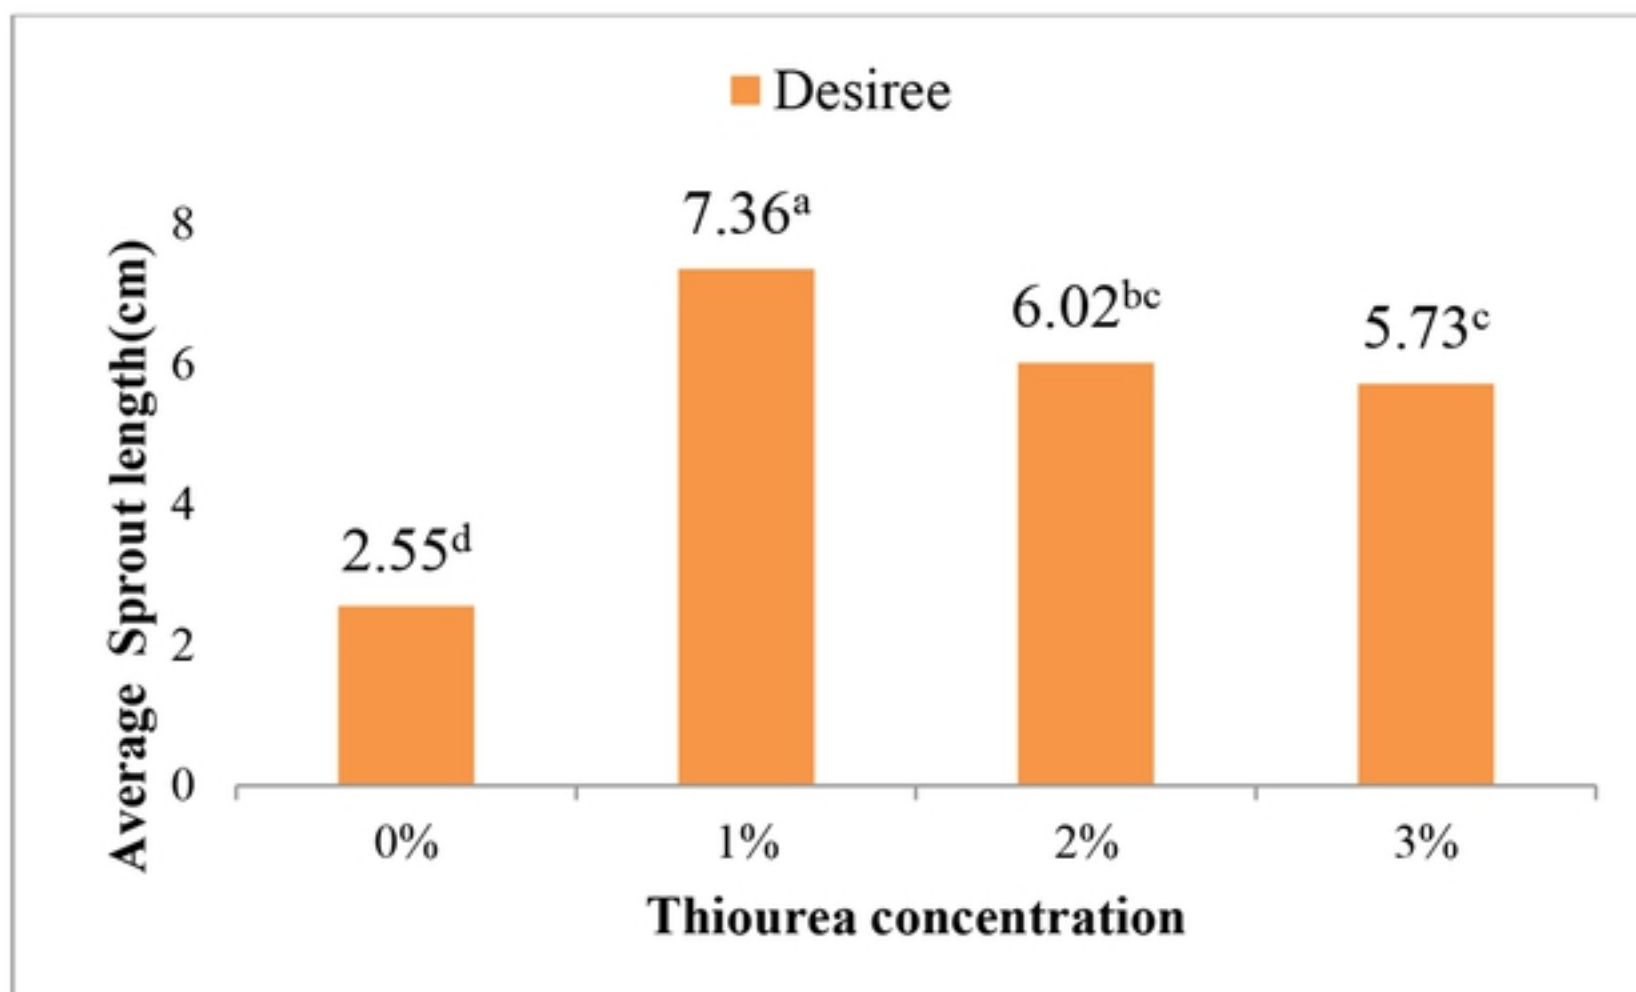

---

|                    |               |
|--------------------|---------------|
| <b>LSD (=0.05)</b> | <b>0.77**</b> |
|--------------------|---------------|

|        |       |
|--------|-------|
| SEm(±) | 0.257 |
|--------|-------|

|      |       |
|------|-------|
| CV % | 7.735 |
|------|-------|

---

|            |      |
|------------|------|
| Grand Mean | 5.76 |
|------------|------|

---

SEM- standard error of mean, CV- Coefficient of variation, LSD- Least significant difference, \*\* significant at 1% level of significance

The common letter(s) within column/ bar indicate non-significant difference based on Duncan Multiple Range Test (DMRT) at 0.05 level of significance.

**Fig 2: Effect of different Thiourea concentrations on sprout length (cm) of Cardinal potato at 49 days after treatment.**

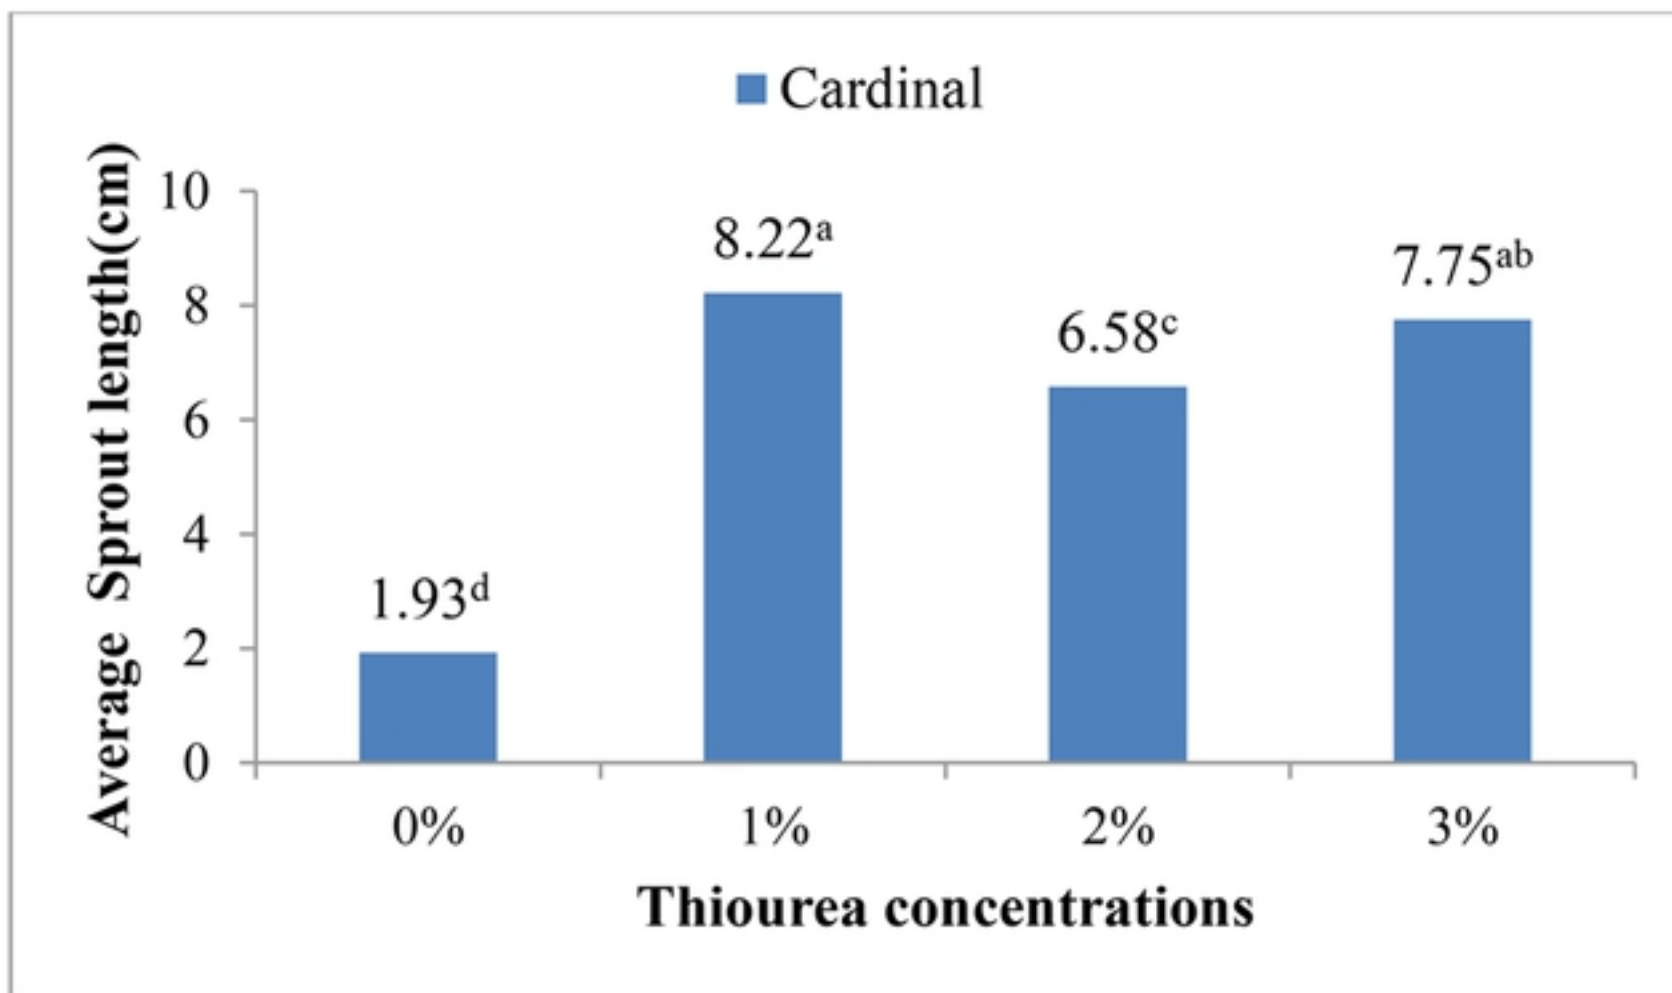

**LSD (=0.05) 0.77\*\***

SEm(±) 0.257

CV % 7.735

Grand Mean 5.76

SEM- standard error of mean, CV- Coefficient of variation, LSD- Least significant difference, \*\* significant at 1% level of significance

The common letter(s) within column/ bar indicate non-significant difference based on Duncan Multiple Range Test (DMRT) at 0.05 level of significance.

**Fig 3: Effect of different Thiourea concentrations on sprout density (sprouts/tuber) of Desiree potato at 49 days after treatment.**

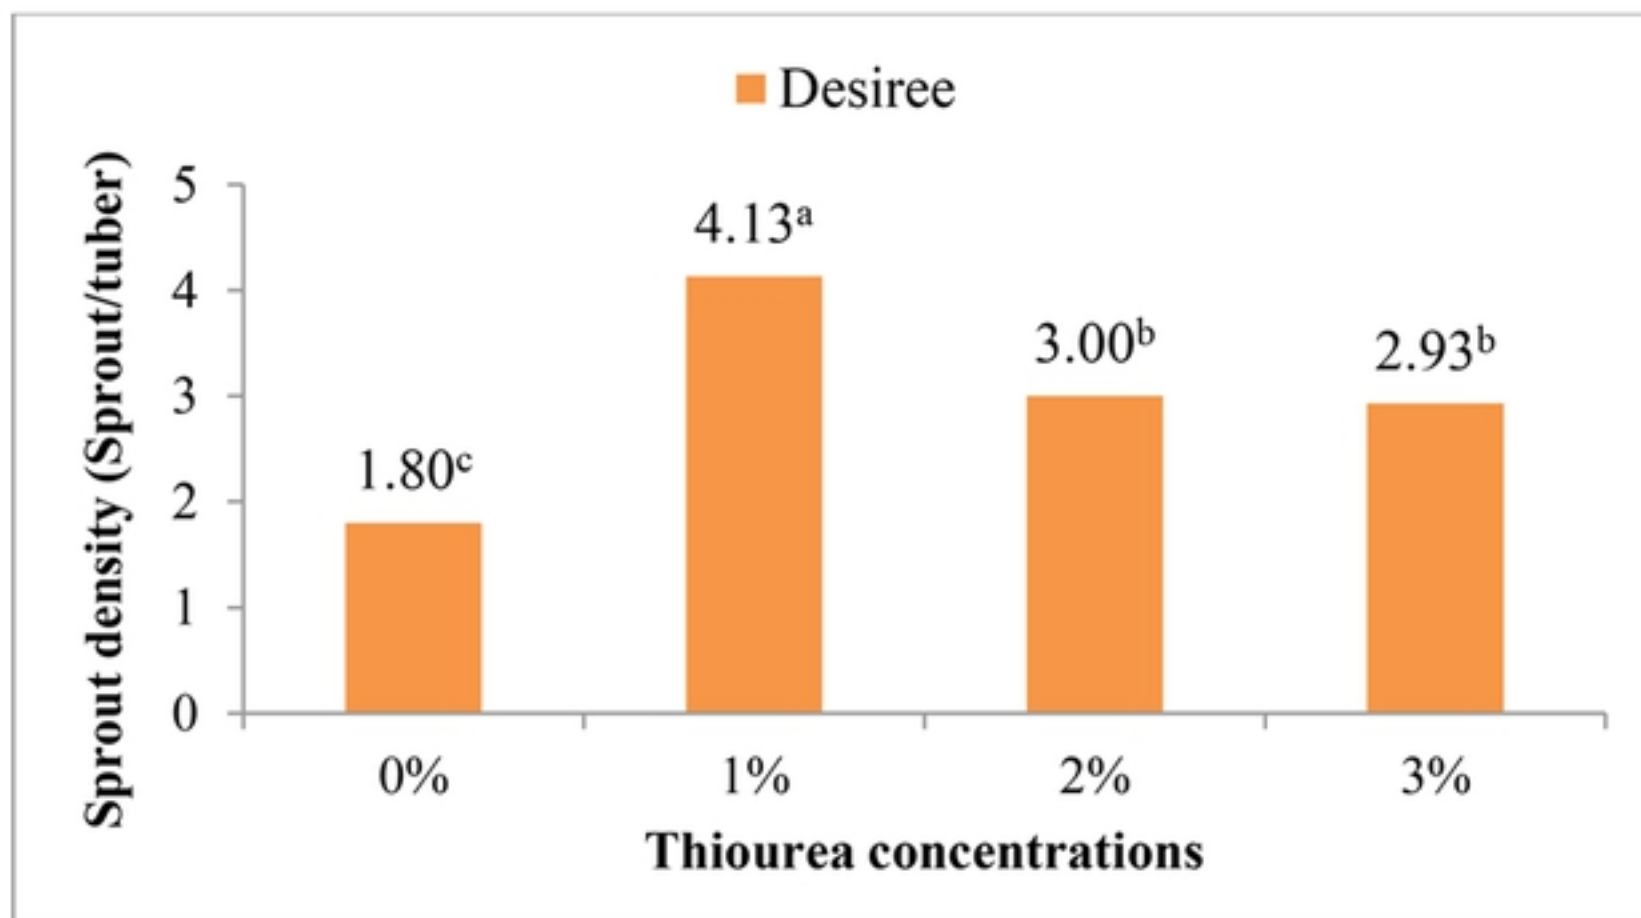

|                    |               |
|--------------------|---------------|
| <b>LSD (=0.05)</b> | <b>0.36**</b> |
| SEm(±)             | 0.12          |
| CV %               | 9.38          |
| <b>Grand Mean</b>  | <b>2.22</b>   |

SEM- standard error of mean, CV- Coefficient of variation, LSD- Least significant difference, \*\* significant at 1% level of significance

The common letter(s) within column/ bar indicate non-significant difference based on Duncan Multiple Range Test (DMRT) at 0.05 level of significance.

**Fig 4: Effect of different Thiourea concentrations on sprout density (Sprouts/tuber) of Cardinal potato at 49 days after treatment.**

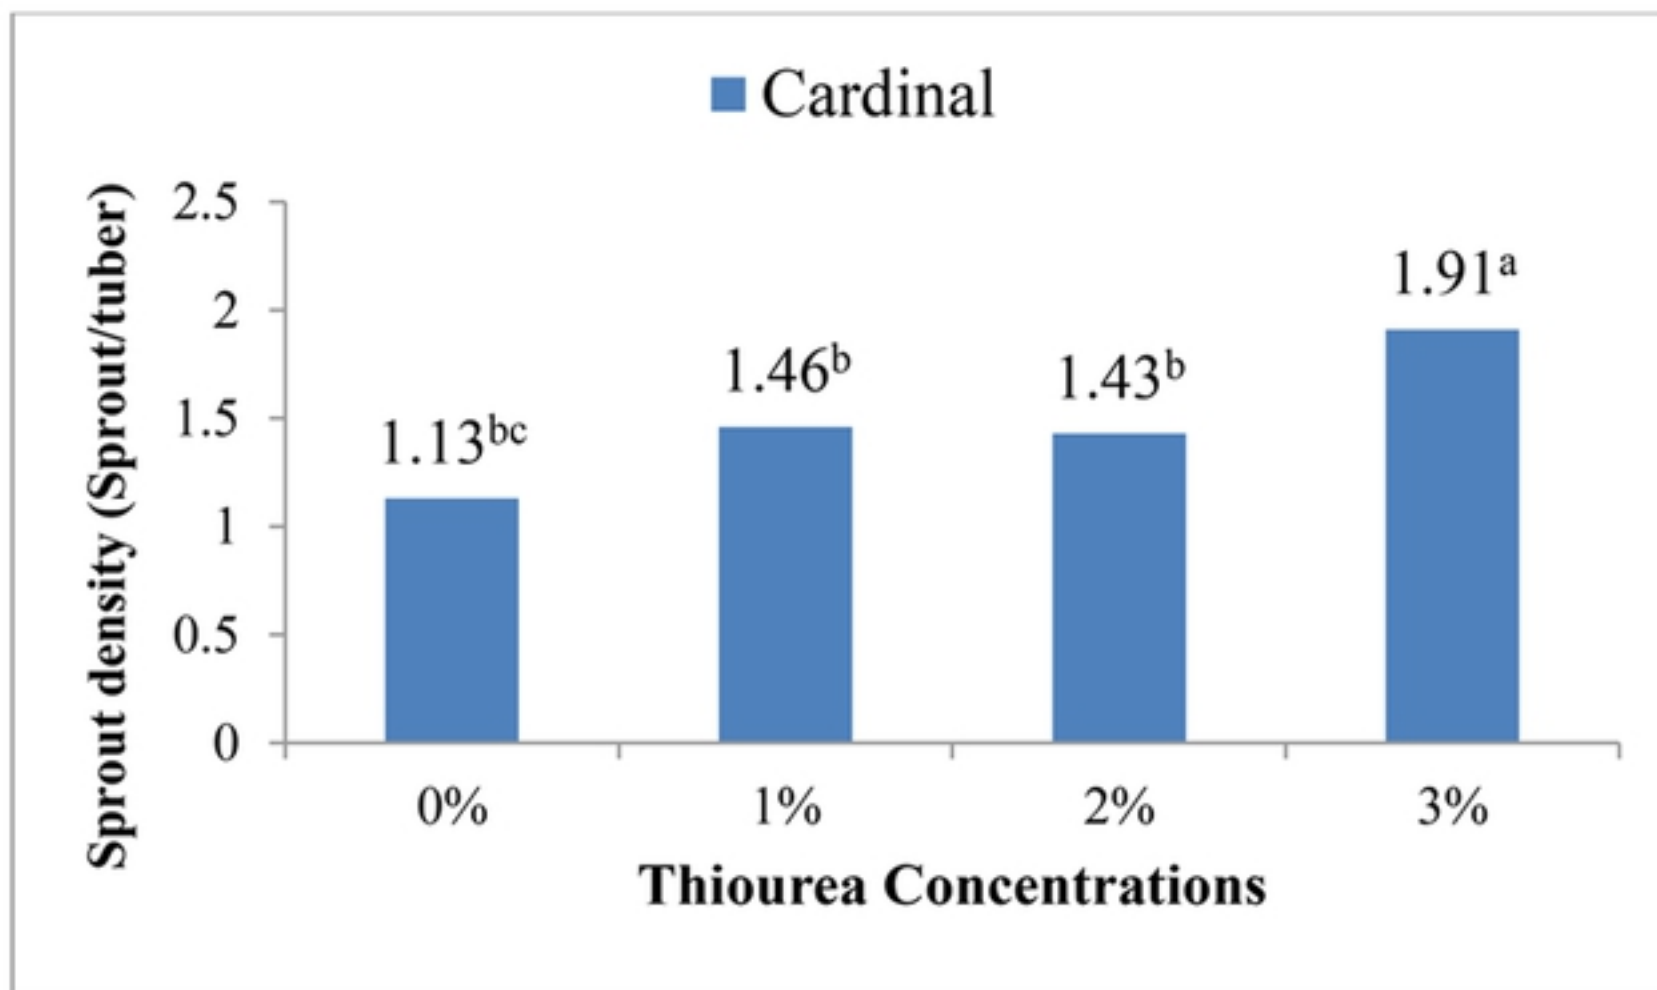

|                    |               |
|--------------------|---------------|
| <b>LSD (=0.05)</b> | <b>0.36**</b> |
| SEm(±)             | 0.12          |
| CV %               | 9.38          |
| Grand Mean         | 2.22          |

SEM- standard error of mean, CV- Coefficient of variation, LSD- Least significant difference, \*\* significant at 1% level of significance

The common letter(s) within column/ bar indicate non-significant difference based on Duncan Multiple Range Test (DMRT) at 0.05 level of significance.
